# Supplementary material for: Experiences and impact of psychiatric inpatient admissions far away from home: a qualitative study with young people, parents/carers and healthcare professionals
Source: PubMed Central journal article supplement — BMJ Ment Health. 2024 Apr 25;27(1):e300991. doi: 10.1136/bmjment-2024-300991 (PMC11057239; doi:10.1136/bmjment-2024-300991), 2024-04-25
Supplement: bmjment-2024-300991supp002.pdf [file bmjment-2024-300991supp002.pdf]

## Supplementary Materials 2: Parent/Carer Interview Schedule

| Topic & Timing                        | Discussion Point                                                                                               | Prompts                                                                                                                                                                                                                                                                                                                                                                                                                                                                                                                                                                                                                                                                                                                                                                                                                                                                                                                                                                                                                                                                                                                                                                                                                                                                                                                                                                                                                                                                                                                   |
|---------------------------------------|----------------------------------------------------------------------------------------------------------------|---------------------------------------------------------------------------------------------------------------------------------------------------------------------------------------------------------------------------------------------------------------------------------------------------------------------------------------------------------------------------------------------------------------------------------------------------------------------------------------------------------------------------------------------------------------------------------------------------------------------------------------------------------------------------------------------------------------------------------------------------------------------------------------------------------------------------------------------------------------------------------------------------------------------------------------------------------------------------------------------------------------------------------------------------------------------------------------------------------------------------------------------------------------------------------------------------------------------------------------------------------------------------------------------------------------------------------------------------------------------------------------------------------------------------------------------------------------------------------------------------------------------------|
| <b>Background</b><br>5 minutes        | <i>Can you tell me, first of all, about your recent experience of (Young person's) admission to XXXXXXX?</i>   | Seek to establish a detailed narrative account, including<br>Events leading up to admission<br>Process of referral and how it was initiated<br>How did YP and R/other family members feel about being referred to unit?<br><ul style="list-style-type: none"> <li>Relieved, apprehensive, unnecessary, resisted etc</li> </ul> To what extent did R feel that the YP and family were consulted, involved in decisions about care?<br><ul style="list-style-type: none"> <li>What is actual, appropriate and desired involvement of family in discussion and decisions about care?</li> <li>Did R feel that there was a choice of options for (YP) Was this important?</li> <li>What were R's expectations of the unit, before YP was admitted?</li> </ul>                                                                                                                                                                                                                                                                                                                                                                                                                                                                                                                                                                                                                                                                                                                                                                 |
| <b>Experience</b><br>10 minutes       | <i>Can you tell me what happened, once YP was admitted? What was it like for her being a patient at XXXXX?</i> | Experience of<br><ul style="list-style-type: none"> <li>Environment</li> <li>Other patients</li> <li>Staff</li> <li>Information, communication, support, trust</li> <li>Treatment</li> <li>Type, effect, acceptability</li> <li>Involvement in decisions</li> <li>Length of stay</li> <li>Visits/support from family and friends</li> </ul> Did you find it easy to keep in touch with YP and provide support while she was on the unit?<br><ul style="list-style-type: none"> <li>Frequency and duration of visits</li> <li>What happened during visits?</li> <li>Issues of privacy/environment</li> <li>Any issues, difficulties experienced in visiting</li> <li>Time and travel (distance)</li> <li>Need for time of work</li> <li>Problems with other commitments such as child care</li> <li>Any additional costs incurred?</li> </ul> Do you think YP found find it helpful to be in the unit?<br>In what way? What did think helped them most?<br>Were there any things you did not like/felt were not helpful?<br>Do you think that being admitted to xxxxxx helped YP get better?<br>Was xxxxxxxx an appropriate place for someone of her age?<br>Do you think xxxxxxxxxxxxxx was the best place for her at the time?<br>Was there a better alternative?<br>How do you feel about your/family's involvement in YP's care while she was admitted to XXXXXXXX?<br>Information about what was happening and treatment plan<br>Access and communication with staff<br>Discussion and involvement in decision making |
| <b>Other experiences</b><br>5 minutes | <i>Was this the first time YP had been admitted as an inpatient?</i>                                           | If no – explore previous admissions, as above.                                                                                                                                                                                                                                                                                                                                                                                                                                                                                                                                                                                                                                                                                                                                                                                                                                                                                                                                                                                                                                                                                                                                                                                                                                                                                                                                                                                                                                                                            |

|                                                    |                                                                                                                                                        |                                                                                                                                                                                                                                                                                                                                                                                                                                                                                                                                                                                      |
|----------------------------------------------------|--------------------------------------------------------------------------------------------------------------------------------------------------------|--------------------------------------------------------------------------------------------------------------------------------------------------------------------------------------------------------------------------------------------------------------------------------------------------------------------------------------------------------------------------------------------------------------------------------------------------------------------------------------------------------------------------------------------------------------------------------------|
| <p><b>Post admission</b></p> <p>10 minutes</p>     | <p><i>Since YP came home after being in XXXXXX, how have things been? Can you tell me how things are just now?</i></p>                                 | <p>Health (any treatment)<br/>Home circumstances<br/>School<br/>Relationships<br/>Do you have any idea about what YP will want to do in future?<br/>Aspirations re health, job etc<br/>Do you have any concerns about this?</p>                                                                                                                                                                                                                                                                                                                                                      |
| <p><b>COVID-19</b></p> <p>5 minutes</p>            | <p><i>How was your experience during the COVID-19 pandemic</i></p>                                                                                     | <p>TBC - Covid-19 experience<br/><br/>Difference with other admissions if relevant</p>                                                                                                                                                                                                                                                                                                                                                                                                                                                                                               |
| <p><b>Reflection</b></p> <p>5 minutes</p>          | <p><i>Looking back, what do you think about the time YP spent in xxxxxx</i></p>                                                                        | <p>Helpful/unhelpful<br/><br/>Do you think it has had any good/positive or bad or negative effects? (as appropriate)<br/><br/>Was there anything else that helped YP get better at this time?<br/>Friends, family, support groups, activities etc: relative importance, compared to admission and professional help<br/><br/>Can you think of any ways that the experience of young people in YP's situation when she was admitted to XXXXXX could be improved:<br/><br/>Finally, what advice would you give someone who was in your situation, just before YP went to XXXXXXXX?</p> |
| <p><b>Ending &amp; Sum Up</b></p> <p>5 minutes</p> | <p><i>"Is there anything else you have to add to what we have been talking about? Anything that is important that we haven't covered already?"</i></p> |                                                                                                                                                                                                                                                                                                                                                                                                                                                                                                                                                                                      |
