# Supplementary material for: Experiences and impact of psychiatric inpatient admissions far away from home: a qualitative study with young people, parents/carers and healthcare professionals
Source: PubMed Central journal article supplement — BMJ Ment Health. 2024 Apr 25;27(1):e300991. doi: 10.1136/bmjment-2024-300991 (PMC11057239; doi:10.1136/bmjment-2024-300991), 2024-04-25
Supplement: bmjment-2024-300991supp003.pdf [file bmjment-2024-300991supp003.pdf]

## Supplementary Materials 3: Child and Adolescent Psychiatrist Interview Schedule

| Topic & Timing                                                    | Discussion Point                                                                                                                                                                              | Prompts                                                                                                                                                                                                                                                                                                                                                                                                                                                                                                                                                                                                                                                                                                                                                                                                                                                                                                                                                                                                                                                                                                                                                                                                                                                                                                                                                                                              |
|-------------------------------------------------------------------|-----------------------------------------------------------------------------------------------------------------------------------------------------------------------------------------------|------------------------------------------------------------------------------------------------------------------------------------------------------------------------------------------------------------------------------------------------------------------------------------------------------------------------------------------------------------------------------------------------------------------------------------------------------------------------------------------------------------------------------------------------------------------------------------------------------------------------------------------------------------------------------------------------------------------------------------------------------------------------------------------------------------------------------------------------------------------------------------------------------------------------------------------------------------------------------------------------------------------------------------------------------------------------------------------------------------------------------------------------------------------------------------------------------------------------------------------------------------------------------------------------------------------------------------------------------------------------------------------------------|
| <b>Case Example background and circumstance</b><br><br>10 minutes | <i>“Can you tell me, first of all, about a recent case involving referral of a young person to an inpatient unit: this could be locally, at some distance from home, or to an adult ward”</i> | Seek to establish a detailed narrative account, including<br>Events leading up to referral<br>What factors indicated that inpatient admission was necessary?<br>were there any other options?<br>Process of referral and how it was initiated<br>was there more than one option of inpatient unit?<br>was the YP admitted to R’s preferred unit?<br>if not, why not?<br>How did YP and R/other family members feel about being referred to unit?<br>Relieved, apprehensive, unnecessary, resisted etc<br>To what extent did you feel that the YP and family were consulted, involved in decisions about care?<br>What do you perceive to be the actual, appropriate and desired involvement of family in discussion and decisions about care?<br>What kind of contact, if any, did you maintain with 1. the YP and 2. the family during the period of admission?<br>what were the consequences of being able/<br>not able to maintain such contact?<br>Do you think YP found find it helpful to be in the unit?<br>In what way? What did think helped them most?<br>Were there any negative aspects or consequences of the admission?<br>How would you assess the outcome of the YP’s admission?<br>How would you manage a similar episode affecting this YP in future?<br>Do you think (the unit) was an appropriate place for someone of YP’s age?<br>If not, what would have been the best place? |
| <b>Impact of admission</b><br><br>5 minutes                       | <i>“What are the consequences of each type of admission (adult, distant, local): negative and positive?”</i>                                                                                  | e.g. re experience of being an inpatient, contact with family, contact with familiar services and health professionals, ease of reintegration into family, school, community, etc<br>Do inpatient admissions pose any issues regarding continuity of care and the YP’s engagement with CAMHS following discharge home?<br>Do you think it can ever be helpful for some YP to be admitted to a unit at some distance from home? (If so, in what ways)<br>Do you think that some YP might prefer admission to an adult, rather than a children’s unit, or is this always inappropriate? (Explore)                                                                                                                                                                                                                                                                                                                                                                                                                                                                                                                                                                                                                                                                                                                                                                                                      |
| <b>Experiences and Perceptions</b><br><br>10 minutes              | <i>“YP was admitted to a local/distant YP unit/adult ward. How often does this happen?”</i>                                                                                                   | Under what circumstances (choice, necessity etc)<br><br>What about (the other two options): do you ever refer YP to either of these? <ul style="list-style-type: none"> <li>• under what circumstances?</li> </ul> How do you feel that admission to a local adolescent unit differs from a distance adolescent unit (as appropriate)? Pros / cons?<br><br>What is your view about young people being admitted to distance adolescent units?                                                                                                                                                                                                                                                                                                                                                                                                                                                                                                                                                                                                                                                                                                                                                                                                                                                                                                                                                         |

|                                                                  |                                                                                                                                                |                                                                                                                                                                                                                                                                                                                                                                                                                                                                                                                                                                                                                                                                                                                                                                                                                                                                                                                                                                                                                                                                                                                                                                                                                                                                                                                                  |
|------------------------------------------------------------------|------------------------------------------------------------------------------------------------------------------------------------------------|----------------------------------------------------------------------------------------------------------------------------------------------------------------------------------------------------------------------------------------------------------------------------------------------------------------------------------------------------------------------------------------------------------------------------------------------------------------------------------------------------------------------------------------------------------------------------------------------------------------------------------------------------------------------------------------------------------------------------------------------------------------------------------------------------------------------------------------------------------------------------------------------------------------------------------------------------------------------------------------------------------------------------------------------------------------------------------------------------------------------------------------------------------------------------------------------------------------------------------------------------------------------------------------------------------------------------------|
|                                                                  |                                                                                                                                                | <p>How regularly do you experience this?</p> <p>Who refers these patients?</p> <p>Do you receive appropriate information in the documentation?</p> <p>Do you have a protocol for managing young people at distance from home? If yes, useful or not?</p> <p>What involvement do you have in planning and managing the process of these admissions? Who else is involved?</p> <p>Are there any particular issues that you have faced in these circumstances?</p> <p>How do you feel admission to a ward at distance from home affects the patient and family experience?</p> <p>To what extent is there joint working with CAMHS consultants / GPs in the young people's local areas? How is this achieved / barriers to this? How could it be improved?</p> <p>To what extent (if at all) does admission to a distance adolescent unit influence the success of treatment / the experience of patients and family?</p> <p>How do you plan the continuity of care / post discharge care? Who else is involved in this? How easily is this achieved? How could it be improved?</p> <p>Where referrals are not accepted, what are the reasons? Is an alternative offered?</p> <p>What do you think needs to happen to reduce admissions of young people to distant adolescent units / adult psychiatric wards (as appropriate)?</p> |
| <p><b>Comparisons with other admissions</b></p> <p>5 minutes</p> | <p><i>“How does your experience of cases such as these differ during the COVID-19 pandemic</i></p>                                             |                                                                                                                                                                                                                                                                                                                                                                                                                                                                                                                                                                                                                                                                                                                                                                                                                                                                                                                                                                                                                                                                                                                                                                                                                                                                                                                                  |
| <p><b>Reflection</b></p> <p>5 minutes</p>                        | <p><i>“Do you think it should be possible for people in YP's situation to avoid inpatient admission, and be treated in the community?”</i></p> | <p>what would be required to enable this to happen?</p>                                                                                                                                                                                                                                                                                                                                                                                                                                                                                                                                                                                                                                                                                                                                                                                                                                                                                                                                                                                                                                                                                                                                                                                                                                                                          |

|                                                    |                                                                                                                                                        |                                                                                                                                                                                                                                                                                                                                                                                                                                                                                                                                                            |
|----------------------------------------------------|--------------------------------------------------------------------------------------------------------------------------------------------------------|------------------------------------------------------------------------------------------------------------------------------------------------------------------------------------------------------------------------------------------------------------------------------------------------------------------------------------------------------------------------------------------------------------------------------------------------------------------------------------------------------------------------------------------------------------|
| <p><b>Policy/Guidelines</b></p> <p>5 minutes</p>   | <p><i>“How do current practice guidelines and policy drivers inform your care of young people like XX(YP)?”</i></p>                                    | <p>Do you think it should be possible for people in YP’s situation to avoid inpatient admission, and be treated in the community?</p> <ul style="list-style-type: none"> <li>○ what would be required to enable this to happen?</li> </ul> <p>Are there any changes in current policy/clinical guidelines that you feel would improve current care of YP in psychiatric services?</p> <p>Are there any changes you would like to see in the organisation and resources available to you in managing the care of YP with severe mental health problems?</p> |
| <p><b>Ending &amp; Sum Up</b></p> <p>5 minutes</p> | <p><i>“Is there anything else you have to add to what we have been talking about? Anything that is important that we haven’t covered already?”</i></p> |                                                                                                                                                                                                                                                                                                                                                                                                                                                                                                                                                            |
