# Supplementary material for: Experiences and impact of psychiatric inpatient admissions far away from home: a qualitative study with young people, parents/carers and healthcare professionals
Source: PubMed Central journal article supplement — BMJ Ment Health. 2024 Apr 25;27(1):e300991. doi: 10.1136/bmjment-2024-300991 (PMC11057239; doi:10.1136/bmjment-2024-300991), 2024-04-25
Supplement: bmjment-2024-300991supp005.pdf [file bmjment-2024-300991supp005.pdf]

**Supplementary Materials 5: YP/Parent/Carer Working Framework**

|                                                  | <b>Definition</b>                                                                                                                                                |
|--------------------------------------------------|------------------------------------------------------------------------------------------------------------------------------------------------------------------|
| <b>Referral</b>                                  |                                                                                                                                                                  |
| 1.1 Process                                      | How referral was initiated, factors that indicated admission was necessary                                                                                       |
| 1.2 Feelings about referral                      | How they felt about being referred to the unit                                                                                                                   |
| 1.3 Involvement of YP & family                   | Decisions about care, input (if any) into unit being referred to.                                                                                                |
| 1.4 Expectations                                 | Thoughts/concerns/expectations about being referred to that specific unit                                                                                        |
| 1.5 Outcome/overall impact of admission          | If discharged, how are they doing now?                                                                                                                           |
|                                                  |                                                                                                                                                                  |
| <b>Experiences/Perceptions of Admission</b>      |                                                                                                                                                                  |
| 2.1 Environment/Treatment                        | Relationships with staff/other patients, ongoing involvement in treatment decisions                                                                              |
| 2.2 Visits                                       | Frequency. Any issues or difficulties experienced. Any support required from friends/family?                                                                     |
| 2.3 Positive impacts/consequences of admission   | Views about positive consequences for YP/family e.g. experiences being on the wards, improved health outcomes, break away from issues                            |
| 2.4 Negative impacts/consequences of admission   | Views about negative consequences for YP/family e.g. experience of being an inpatient, contact with family, ease of reintegration into family, school, community |
| 2.5 Discharge                                    | Issues regarding continuity of care and the YP's engagement with CAMHS following discharge home                                                                  |
| 2.6 Comparison with other admissions             | Similarities/differences between current and previous admissions (if any)                                                                                        |
|                                                  |                                                                                                                                                                  |
| <b>Post Admission</b>                            |                                                                                                                                                                  |
| 3.1 Health                                       | How are they now, thoughts on treatment, areas for improvement                                                                                                   |
| 3.2 Home/School/Relationship circumstances       | How are they now, any differences to before admission                                                                                                            |
|                                                  |                                                                                                                                                                  |
| <b>Reflection</b>                                |                                                                                                                                                                  |
| 5.1 Suggestions for changes to reduce admissions | Areas in need of improvement                                                                                                                                     |
| 5.2 Advice to others in similar position         | "If you knew then what you know now"                                                                                                                             |
