# Supplementary material for: Experiences and impact of psychiatric inpatient admissions far away from home: a qualitative study with young people, parents/carers and healthcare professionals
Source: PubMed Central journal article supplement — BMJ Ment Health. 2024 Apr 25;27(1):e300991. doi: 10.1136/bmjment-2024-300991 (PMC11057239; doi:10.1136/bmjment-2024-300991), 2024-04-25
Supplement: bmjment-2024-300991supp006.pdf [file bmjment-2024-300991supp006.pdf]

## Supplementary Materials 6: HCPs Working Framework

|                                             | Definition                                                                                                                                                                                                           |
|---------------------------------------------|----------------------------------------------------------------------------------------------------------------------------------------------------------------------------------------------------------------------|
| <b>Referral</b>                             |                                                                                                                                                                                                                      |
| 1.1 Process                                 | How referral was initiated, factors that indicated admission was necessary                                                                                                                                           |
| 1.2 Involvement of YP & family              | Involvement in decisions about care i.e. level of 'shared' decision-making around a) whether to admit & then b) where to admit. How decisions were made e.g. if alternative units considered and discussed with them |
| 1.3 Impact of referral                      | Professionals perceptions of YP and family's feelings about being referred to that specific unit                                                                                                                     |
| 1.4 Contact                                 | Thoughts on contact between services/professionals and the YP/family during period of admission                                                                                                                      |
| <b>Impact of admission</b>                  |                                                                                                                                                                                                                      |
| 2.1 Positive                                | Views about positive consequences for YP/parent/carer due to admission e.g. experiences being on the wards, improved health outcomes, any comments on advantages of YP being admitted far away or to adult ward      |
| 2.2 Negative                                | Views about negative consequences for YP/parent/carer due to referral and admission e.g. experience of being an inpatient, contact with family, ease of reintegration into family, school, community                 |
| 2.3 Continuity of care                      | Issues regarding continuity of care and the YP's engagement with CAMHS following discharge home                                                                                                                      |
| <b>Services (inpatient and community)</b>   |                                                                                                                                                                                                                      |
| 3.1 Frequency                               | Perceptions of how often far away admissions are happening in their service                                                                                                                                          |
| 3.2 Protocol                                | Any reference to a protocol for managing far away admissions                                                                                                                                                         |
| 3.3 Joint Working                           | Barriers/facilitators to joint working with CAMHS consultants / GPs in the young people's local areas. How is this is achieved, barriers to this and suggestions for improvements                                    |
| 3.4 Working practices                       | Contact between services/teams/discharge. Any improvements to working e.g. online meetings saving travel time                                                                                                        |
| <b>Suggestions for changes/improvements</b> |                                                                                                                                                                                                                      |
| 5.1 Policy/Clinical guidelines              | Areas in need of improvement                                                                                                                                                                                         |
| 5.2 Organisation and/or resources           | Additional resources or organisational requirements to facilitate admissions far away. Including role of crisis or home treatment teams to prevent admissions or enable earlier discharge                            |
| 5.3 Reducing Admissions                     | What is required to reduce such admissions. Including planned and appropriate use of paediatric ward beds or adult medical/psychiatric beds to help avoid a far away admission                                       |
